# Supplementary material for: Molecular cobalt–salen complexes as novel cocatalysts for highly efficient photocatalytic hydrogen production over a CdS nanorod photosensitizer under visible light
Source: Royal Society of Chemistry journal article supplement (doi:10.1039/c5ta03515e), 2015-01-01
Supplement: c5ta03515e1.pdf [file c5ta03515e1.pdf]

***Supporting information***

**Molecular Cobalt-Salen Complexes as Novel Cocatalysts for Highly  
Efficient Photocatalytic Hydrogen Production over CdS Nanorods  
Photosensitizer under Visible Light**

Haiyan Chen, Zijun Sun, Sheng Ye, Dapeng Lu, Pingwu Du\*

CAS Key Laboratory of Materials for Energy Conversion, Department of Materials  
Science and Engineering, *i*ChEM (Collaborative Innovation Center of Chemistry for  
Energy Materials), University of Science and Technology of China (USTC), Hefei,  
230026, China

\*To whom correspondence should be addressed

E-mail: [dupingwu@ustc.edu.cn](mailto:dupingwu@ustc.edu.cn)

Tel/Fax: 86-551-63606207

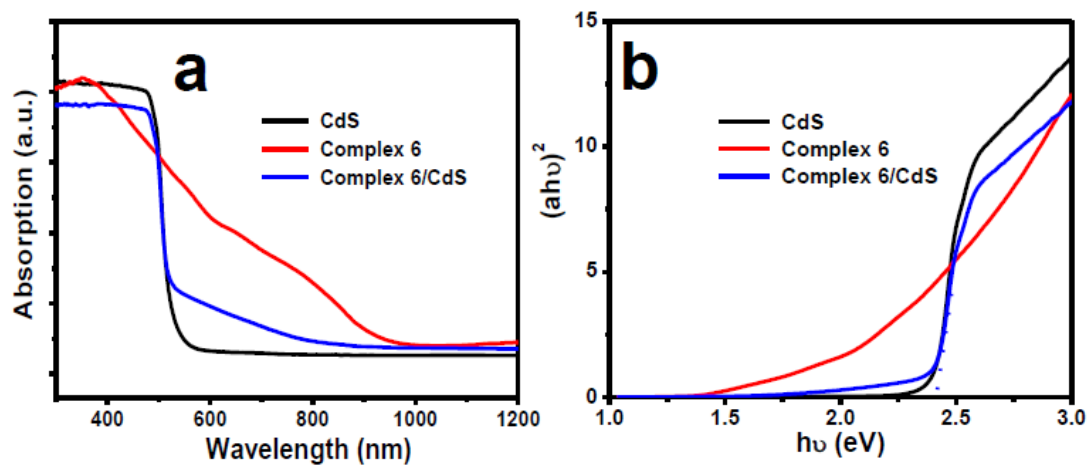

**Figure S1.** (a) UV-vis diffuse reflectance spectra of the prepared pure CdS NRs (black line), complex 6 (red line) and complex 6/CdS NRs mixture (blue line). (b) The estimated band gap spectra obtained from (a).

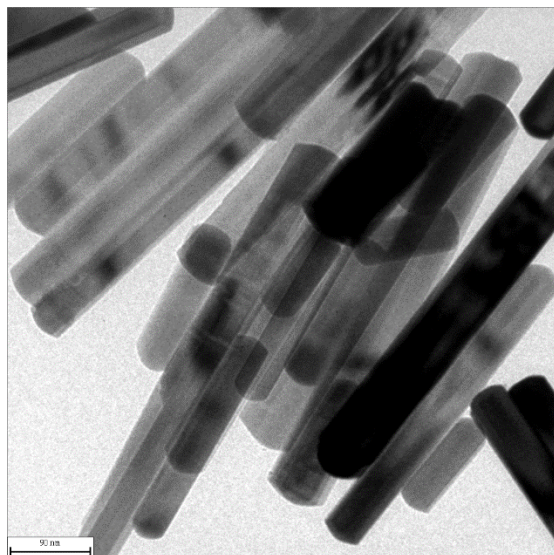

**Figure S2.** TEM image of complex **6**/CdS NRs (1.4 wt % of cobalt in the composite).

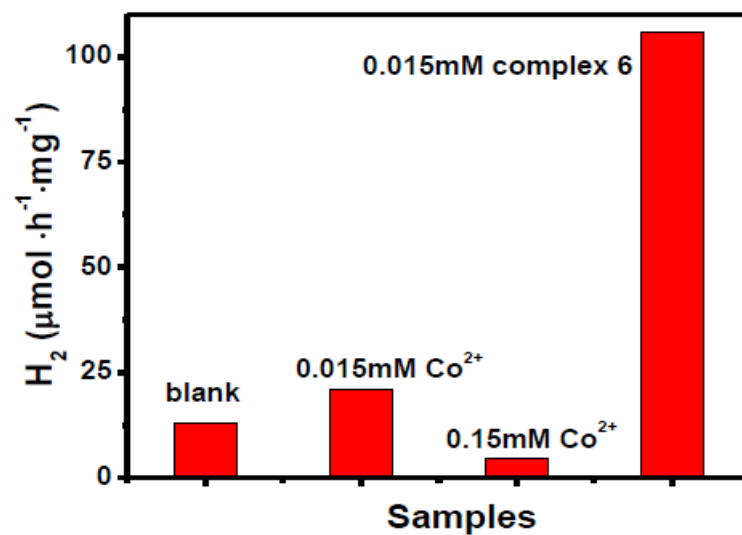

**Figure S3.** Comparison of hydrogen evolution rates of Co<sup>2+</sup> and complex 6 under visible light. The reaction system contains 1.0 mg CdS NRs, 0.25 M Na<sub>2</sub>S, 0.35 M Na<sub>2</sub>SO<sub>3</sub>, 20 mL Millipore water, and 0.015 mM Co<sup>2+</sup>, 0.15 mM Co<sup>2+</sup>, 0.015 mM complex 6 respectively.

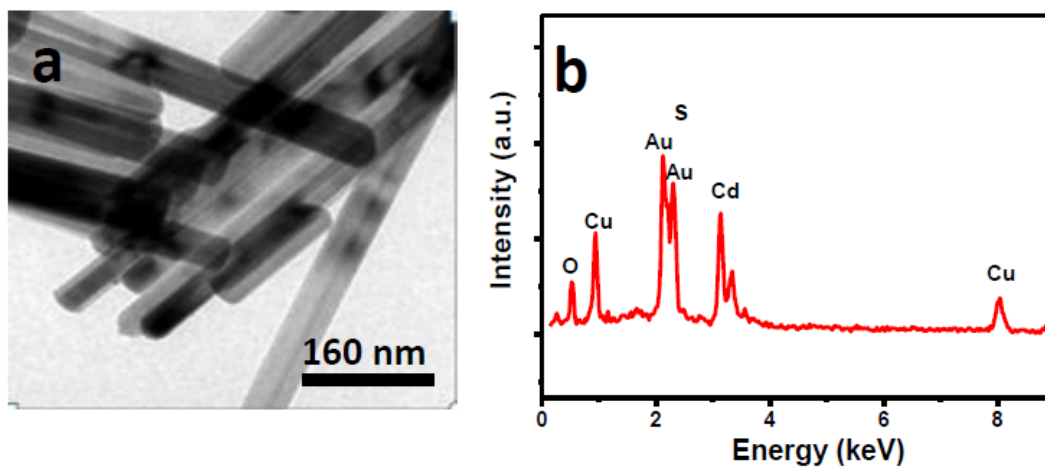

**Figure S4.** TEM image (a) and EDX spectrum (b) of photocatalyst centrifuged by water and acetonitrile respectively after 10 hour irradiation under visible light ( $\lambda > 420$  nm).

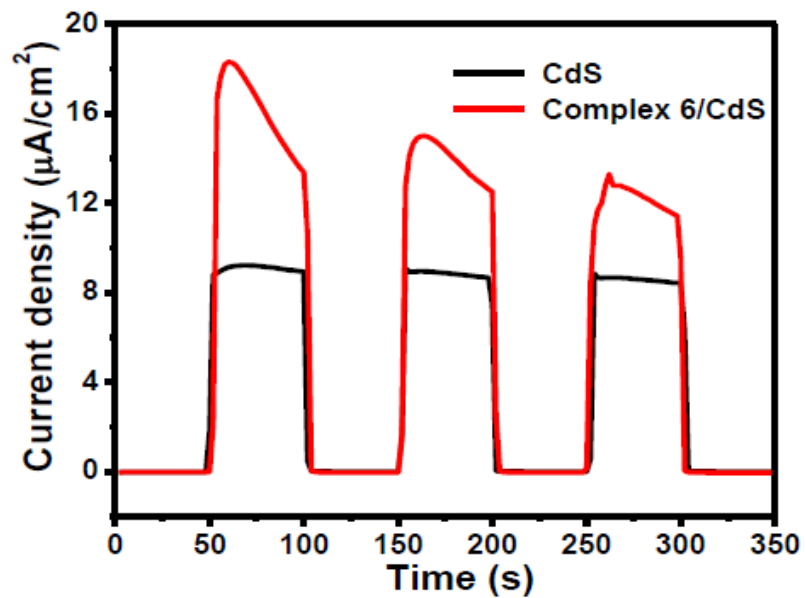

**Figure S5.** Photocurrent density responses of as-prepared pure CdS NRs (black line) and complex 6/CdS NRs mixture (red line). The experiment was performed in a 0.5 M  $\text{Na}_2\text{SO}_4$  solution under chopped irradiation. The applied potential of bulk electrolysis was 0 V versus Ag/AgCl electrode.
